# Supplementary material for: Selective recognition and electrochemical sensing of dicarboxylates with a ferrocene-based bis(o-trifluoroacetylcarboxanilide) receptor
Source: Royal Society of Chemistry journal article supplement (doi:10.1039/b606081a), 2006-01-01
Supplement: b606081a.pdf [file b606081a.pdf]

## Electronic Supplementary Information

For

### Selective recognition and electrochemical sensing of dicarboxylates with a ferrocene-based bis(*o*-trifluoroacetylcarboxanilide) receptor

*Dae-Sik Kim, Hidekazu Miyaji, Byoung-Yong Chang, Su-Moon Park and Kyo Han Ahn*

**Synthesis of ditopic receptor 1:** To a solution of *o*-trifluoroacethylaniline (98 mg, 0.52 mmol) and triethylamine (0.3 mL) in anhydrous THF (3 mL) was added 1,1'-dichlorocarbonylferrocene (80 mg, 0.26 mmol) dissolved in anhydrous THF (3 mL). The reaction mixture was stirred overnight at room temperature. THF was removed on a rotary evaporator and the residue was dissolved in chloroform and then washed with water. The aqueous layer was extracted with chloroform, and the combined organic layers were dried over Na<sub>2</sub>SO<sub>4</sub> and concentrated *in vacuo*. The ditopic receptor **1** was isolated as a reddish brown solid (110 mg, 30%) by column chromatography on silica gel (CHCl<sub>3</sub> : EtOAc = 10 : 1; R<sub>f</sub> = 0.5). <sup>1</sup>H NMR (300 MHz, CD<sub>3</sub>CN): δ 11.03 (s, NH, 2H), 8.36 (d, *J* = 8.6 Hz, 2H), 7.67 (d, *J* = 8.1 Hz, 2H), 7.46 (t, *J* = 7.9 Hz, 2H), 7.11 (t, *J* = 7.7 Hz, 2H), 5.06 (t, *J* = 1.9 Hz, Cp-H, 4H), 4.64 (t, *J* = 1.9 Hz, Cp-H, 4H); <sup>19</sup>F NMR (282 MHz, CD<sub>3</sub>CN) δ 5.52; Mass (MALDI) calc. for C<sub>28</sub>H<sub>18</sub>F<sub>6</sub>FeN<sub>2</sub>O<sub>4</sub> 616.0520, found (*m/z*) 616.0565.

**Synthesis of receptor 2:** To solution of ferrocenecarboxylic acid (500 mg, 2.17 mmol) dissolved in anhydrous dichloromethane (30 mL) at room temperature was added oxalyl chloride (1.5 mL) dropwise, and the resulting mixture was stirred overnight at room temperature, and then it was refluxed for 2 h. The solvent was evaporated and the residue was dried in vacuum to give a crude chlorocarbonylferrocene, which was dissolved in anhydrous THF (10 mL) transferred to a solution of *o*-trifluoroacethylaniline (400 mg, 2.12 mmol) and triethylamine (1.3 mL) dissolved in anhydrous THF (10 mL). The reaction mixture was stirred at room temperature overnight. THF was evaporated and the residue was dissolved in chloroform and washed with water. The organic phase was dried over Na<sub>2</sub>SO<sub>4</sub> and concentrated *in vacuo*. The product **2** was isolated as an orange solid (387 mg, 52%) by column chromatography on silica gel (CHCl<sub>3</sub>:EtOAc=20:1; R<sub>f</sub> = 0.5). <sup>1</sup>H NMR (300 MHz, CD<sub>3</sub>CN): δ 10.95 (s, NH, 1H), 8.69 (d, *J* = 8.1 Hz, 1H), 7.99 (d, *J* = 6.1 Hz, 1H), 7.77 (t, *J* = 8.5 Hz, 1H), 7.26 (t, *J* = 7.2 Hz, 1H), 4.87 (t, *J* = 1.9 Hz, Cp-H, 2H), 4.54 (t, *J* = 1.9

Hz, Cp-H, 2H), 4.28 (s, Cp-H, 5H);  $^{19}\text{F}$  NMR (282 MHz,  $\text{CDCl}_3$ )  $\delta$  5.33; Mass (MALDI) calc. for  $\text{C}_{19}\text{H}_{14}\text{F}_3\text{FeNO}_2$  401.0326, found ( $m/z$ ) 400.0042 (M-1).

**$^1\text{H}$  NMR studies:**

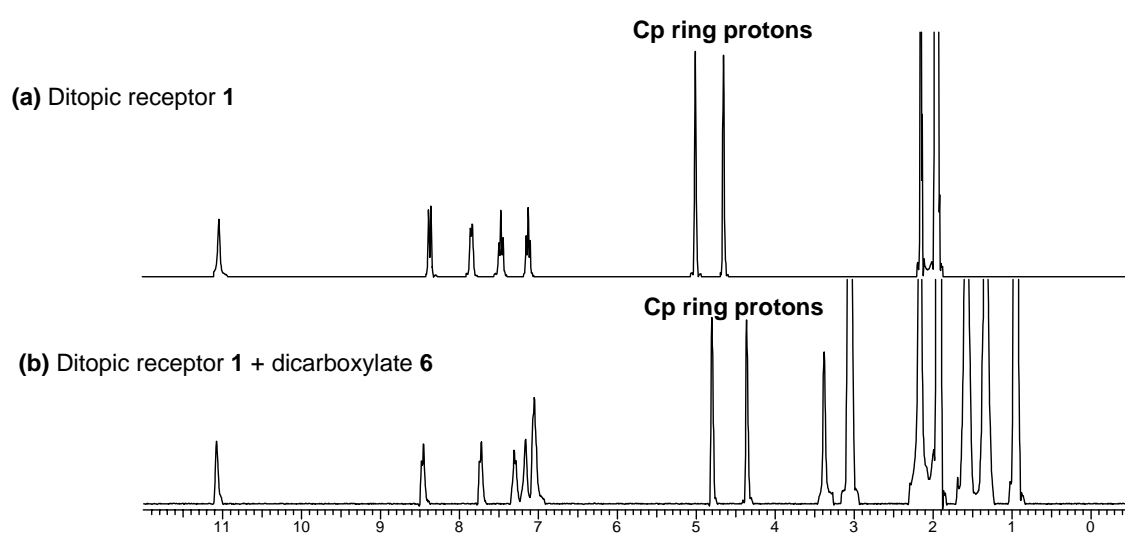

**Fig. S1**  $^1\text{H}$  NMR spectra of (a) the ditopic receptor **1** and (b) the ditopic receptor **1** plus one equivalent of the dicarboxylate **6**, in  $\text{CD}_3\text{CN}$ .

**Job plots:**

$^1\text{H}$  NMR Job plots in  $\text{CD}_3\text{CN}$ , determined by integrating the ratio of the Cp ring protons of the receptor:  $[\text{complex}] = [\text{host}] \times (\text{integration ratio of complex}) / (\text{integration ratio of host} + \text{integration ratio of complex})$ .

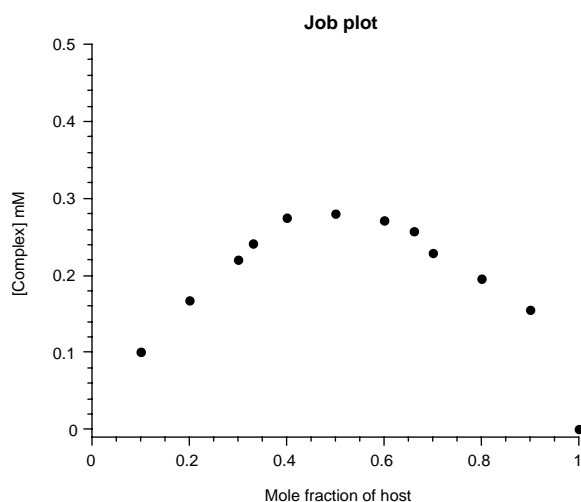

**Fig. S2** Job plot of the receptor **2** with the acetate **3** in  $\text{CD}_3\text{CN}$  at 298 K.

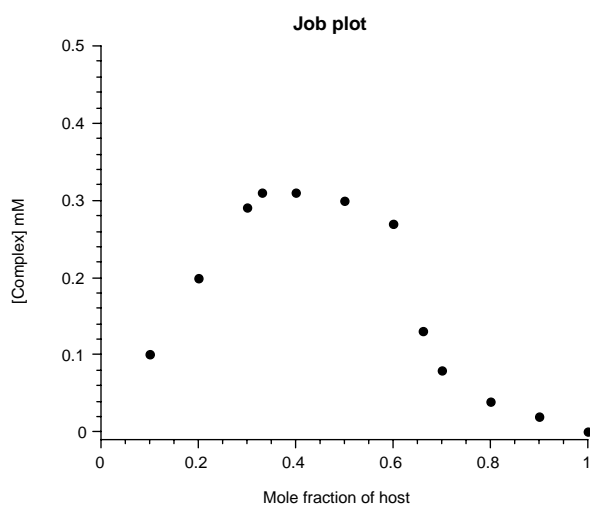

**Fig. S3** Job plot of the ditopic receptor **1** with the acetate **3** in  $\text{CD}_3\text{CN}$  at 298 K.

### The isothermal titration calorimetry (ITC) analysis:

The binding affinity and thermodynamic data were determined by ITC, using an isothermal titration calorimeter (MicroCal, Inc.).

#### A typical procedure:

To a solution of host in the calorimetry cell, 5  $\mu\text{L}$  of guest solution was injected 40 times at 303 K. In all titrations, dilution effects were corrected, which were done by carrying out a separate titration experiment. Thus, the titration result obtained by adding the same guest solution into pure  $\text{CH}_3\text{CN}$  at 303 K was subtracted from the raw titration data to produce the final binding curve. The titration data was analyzed by a curve-fitting software implemented, which gave a number of sites, apparent binding affinity  $K$ , and the standard enthalpy change  $\Delta H^\circ$ .

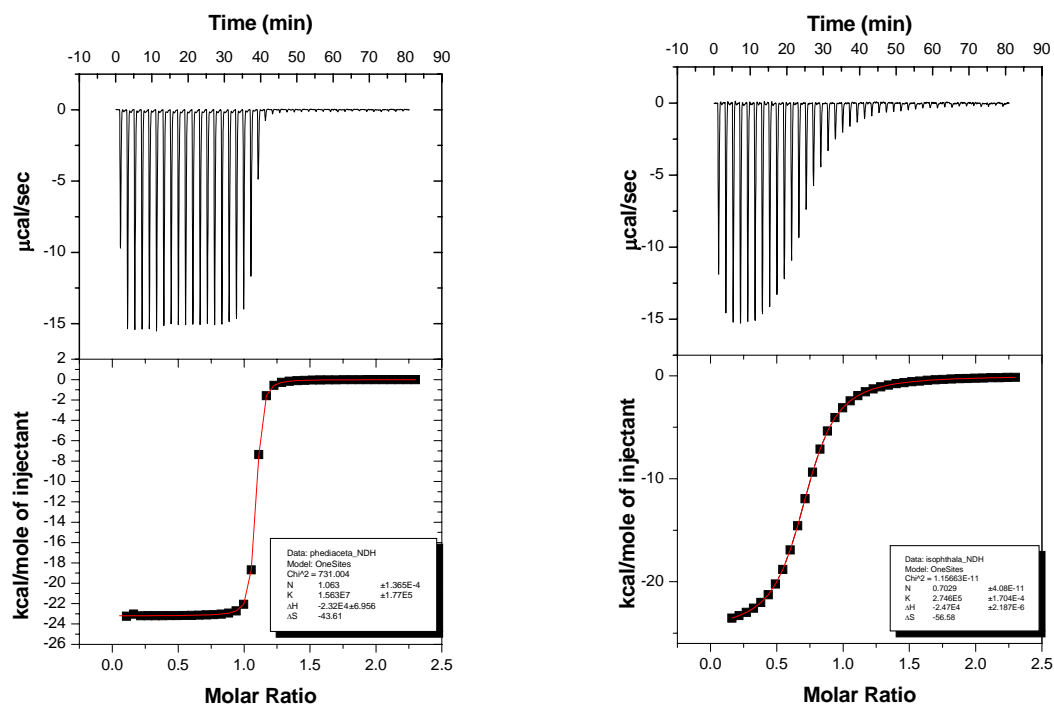

**Fig. S4** ITC data of the ditopic receptor **1** (0.16 mM) with the dicarboxylate **6** (2.4 mM) (left side), with the dicarboxylate **5** (2.4 mM) (right side) in  $\text{CH}_3\text{CN}$  at 303 K.

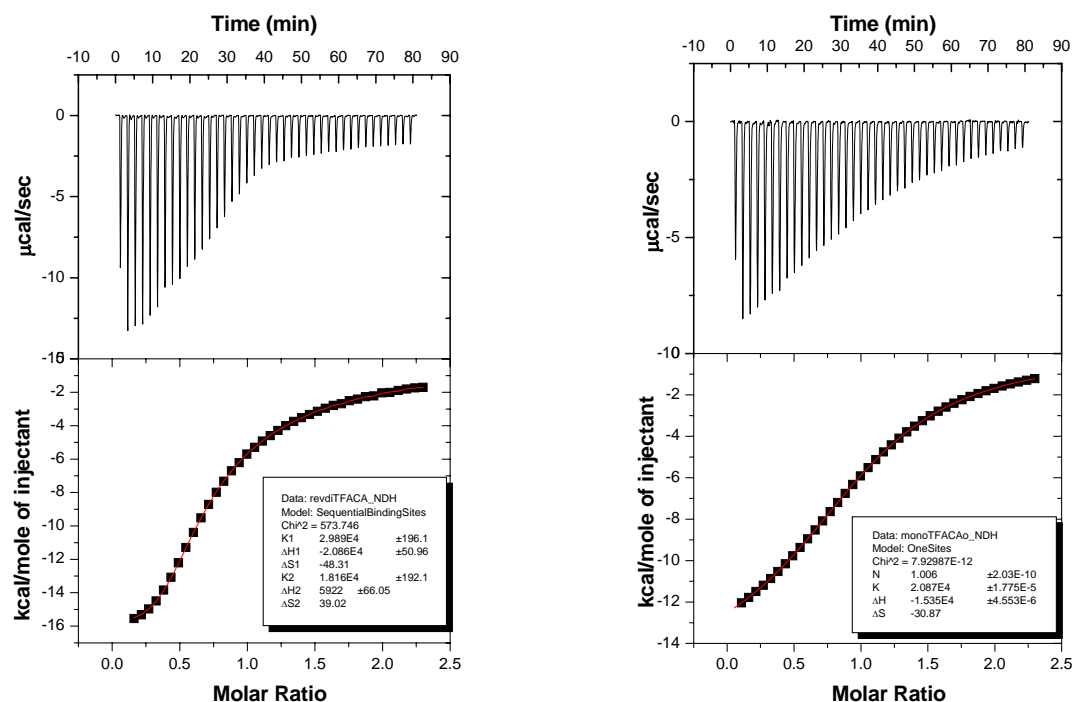

**Fig. S5** ITC data of the ditopic receptor **1** (3.0 mM) with the acetate **3** (0.2 mM)-inverse titration (left side), and ITC data of the ditopic receptor **2** (0.2 mM) with the acetate **3** (3.0mM) (right side) in CH<sub>3</sub>CN at 303 K.

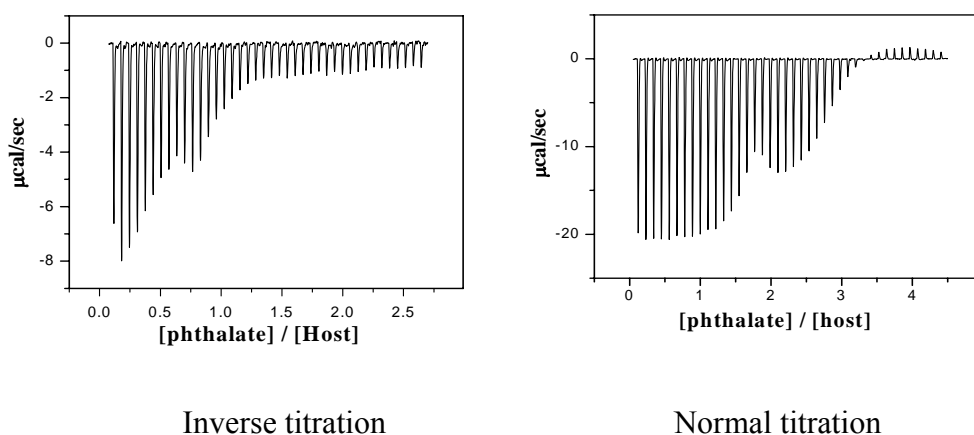

**Fig. S6** ITC data of the ditopic receptor **1** (3.0 mM) with the dicarboxylate **4** (0.2 mM) (left side), and the ditopic receptor **1** (0.16 mM) with the dicarboxylate **4** (4.8 mM) (right side) in CH<sub>3</sub>CN at 303 K.

### Electrochemistry:

Cyclic voltammograms were obtained at 298K using a three-electrode cell connected to a potentiostat. The cell contained a nitrogen-purged acetonitrile solution of receptor **1** (1.0 mM) and [NBu<sub>4</sub>][ClO<sub>4</sub>] as supporting electrolyte (0.1 M). Ag/AgCl (3M NaCl) was used as the reference electrode, with glassy carbon as the working electrode, and Pt as the counter electrode. The scan rate was 250 mVs<sup>-1</sup>. Ferrocene (*ca.* 1 mM) was added as an internal reference in each case (Fc<sup>+</sup>/Fc:  $E^{0'} = 0.51$  V vs Ag/AgCl).

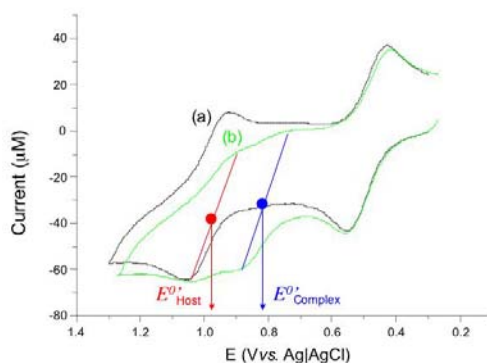

**Fig. S7** Cyclic voltammograms of the ditopic receptor **1** (1.0 mM in CH<sub>3</sub>CN): (a) in the absence of the dicarboxylate **6** and (b) in the presence of 0.7 equivalents of the dicarboxylate **6**.  $E^{0'}_{Host} = 984$  mV,  $E^{0'}_{Complex} = 831$  mV,  $\Delta E^{0'} = E^{0'}_{Complex} - E^{0'}_{Host} = -153$  mV.

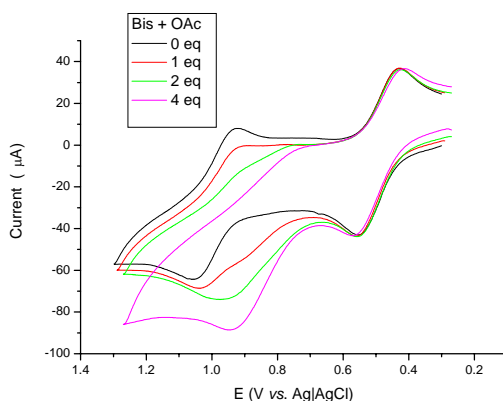

**Fig. S8** Cyclic voltammograms of the ditopic receptor **1** (1.0 mM in CH<sub>3</sub>CN) with the acetate **3**.

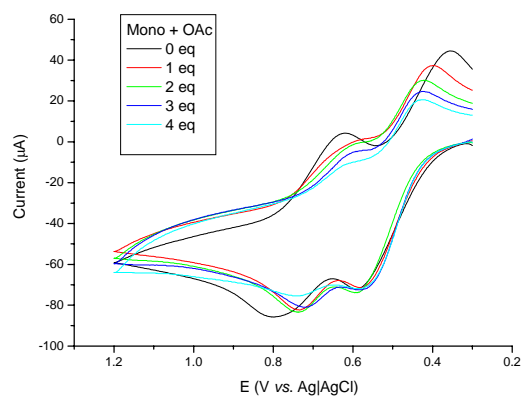

**Fig. S9** Cyclic voltammograms of the receptor **2** (1.0 mM in CH<sub>3</sub>CN) with the acetate **3**.
